1 Enhanced biodegradation of naphthalene by *Pseudomonas* sp. consortium  
2 immobilized in calcium alginate beads

3

4 Kunal Dutta<sup>1</sup>, Sergey Shityakov<sup>2</sup>, Ibrahim Khalifa<sup>3,4</sup>, Saroj Ballav<sup>1</sup>, Debarati Jana<sup>1</sup>,  
5 Tuhin Manna<sup>1</sup>, Monalisha Karmakar<sup>1</sup>, Priyanka Raul<sup>1</sup>, Kartik Chandra Guchhait<sup>1</sup> and  
6 Chandradipa Ghosh<sup>1,\*</sup>

7

8 <sup>1</sup>Microbiology and Immunology Laboratory, Department of Human Physiology with  
9 Community Health, Vidyasagar University, Midnapore -721102, West Bengal, India.

10 <sup>2</sup>Department of Anaesthesia and Critical Care, University of Würzburg, 97080  
11 Würzburg, Germany.

12 <sup>3</sup>Food Technology Department, Faculty of Agriculture, 13736 Moshtohor, Benha  
13 University, Egypt.

14 <sup>4</sup>College of Food Science and Technology, Huazhong Agricultural University, Wuhan  
15 430070, PR China.

16

17

18 \* *Corresponding author:*

19 Prof. Chandradipa Ghosh  
20 Microbiology and Immunology Laboratory  
21 Department of Human Physiology with Community Health  
22 Vidyasagar University  
23 Midnapore - 721102  
24 West Bengal,  
25 INDIA  
26 Email : [ch\\_ghosh@mail.vidyasagar.ac.in](mailto:ch_ghosh@mail.vidyasagar.ac.in)  
27 Phone : +91 3222 276554/555/557 Extn. 450  
28 Fax : +91 3222 275329

29

30

31 Kunal Dutta : [orcid.org/0000-0002-0818-8787](https://orcid.org/0000-0002-0818-8787)

32 Sergey Shityakov : [orcid.org/0000-0002-6953-9771](https://orcid.org/0000-0002-6953-9771)

33 Ibrahim Khalifa : [orcid.org/0000-0002-7648-2961](https://orcid.org/0000-0002-7648-2961)

34

35

36 *Abstract*

37 Polycyclic aromatic hydrocarbons (PAHs) belong to a large group of organic  
38 pollutant which considers as a potential health hazard to living beings. Herein,  
39 naphthalene biodegradation potential by free and immobilized *Pseudomonas putida*  
40 strain KD10 and *Pseudomonas* sp. consortium were studied. Additionally, naphthalene  
41 1, 2-dioxygenase (*nahAc*) was sequenced and analyzed, which reveals two altered  
42 amino acid residues. However, the altered amino acid residues are not present in the  
43 vicinity of the active site. The gas-phase binding free energy ( $\Delta G_{\text{London}}$ ) of the mutant  
44 variant of naphthalene 1, 2-dioxygenase was  $-7.10 \text{ kcal mol}^{-1}$  which closely resembles  
45 the wild type variant. Naphthalene biodegradation rate by *Pseudomonas putida* strain  
46 KD10 was  $79.12 \text{ mg L}^{-1} \text{ day}^{-1}$  and it was significantly elevated up to  $123 \text{ mg L}^{-1} \text{ day}^{-1}$   
47 by the immobilized *Pseudomonas* sp. consortium. The half-life ( $t_{1/2}$ ) for naphthalene  
48 biodegradation was 3.1 days with the inhibition constant ( $k_i$ ), substrate saturation  
49 constant ( $k_s$ ) and maximum specific degradation rate constant ( $q_{\text{max}}$ ) of  $1268 \text{ mg L}^{-1}$ ,  
50  $395.5 \text{ mg L}^{-1}$  and  $0.65 \text{ h}^{-1}$ , respectively, for the *Pseudomonas putida* strain KD10.  
51 However, the  $t_{1/2}$  value was significantly reduced to 2 days along with  $k_i$ ,  $k_s$  and  $q_{\text{max}}$   
52 values of  $1475 \text{ mg L}^{-1}$ ,  $298.8 \text{ mg L}^{-1}$  and  $0.71 \text{ h}^{-1}$ , respectively, by the immobilized  
53 *Pseudomonas* sp. consortium. The GC-MS data suggest that KD10 might follow D-  
54 gluconic acid mediated meta-cleavage pathway of catechol biodegradation. It is  
55 concluded that naphthalene biodegradation performance by immobilized *Pseudomonas*  
56 sp. consortium was superior to free or immobilized *Pseudomonas putida* KD10.  
57 Microbial consortium immobilization could be a useful tool for water quality  
58 management and environmental remediation.

59

60 *Keywords:*

61 *Pseudomonas* sp., petroleum wastes, biodegradation, cell immobilization, mutant

62 naphthalene 1, 2-dioxygenase, rigid-flexible molecular docking.

63

64

65

66

67

68

69

70

71

72

73

74

75

76

77

78

79

80

81

82 *Highlights*

- 83 • Superior naphthalene biodegradation by *Pseudomonas* sp. consortium  
84 immobilized in calcium alginate beads.
- 85 • A common mutation prone amino acid stretch inside chain A of naphthalene 1,  
86 2-dioxygenase has been identified.
- 87 • A new naphthalene biodegradation pathway by *Pseudomonas putida* strain  
88 KD10 has been proposed.

89

90

91

92

93

94

95

96

97

98

99

100

101

102

103

104 *1. Introduction*

105 Polycyclic aromatic hydrocarbons (PAHs) are considered as the potential health  
106 hazard for living beings (Kumari et al., 2018). Environmental agencies including US-  
107 EPA, European Union, Environment-Canada, registered PAH as the priority pollutants  
108 that require immediate human intervention (Wang et al., 2018). The physicochemical  
109 properties of PAH make them a major contributor for soil and groundwater  
110 contamination through bio-magnification (Norris, 2017). Moreover, according to the  
111 Environmental Health Hazard Assessment, U.S.A., naphthalene (NAP) concentration  
112 beyond 170 ppb is not safe drinking (Bruce et al., 1998). Different orthodox and  
113 expensive techniques for environmental remediation, *viz.*, incineration, gasification,  
114 plasma-gasification have been replaced by green-technologies such as bioremediation,  
115 phytoremediation, nanoremediation, *etc.* (Thomé et al., 2018). Bioremediation is  
116 considered as the most cost-effective and eco-friendly oil spill management technique  
117 (Wilson and Jones, 1993). However, while considering the vast volume of a mobile  
118 open water system, bioremediation stumble upon several limiting factors such as the  
119 low local concentration of the effective microorganisms, loss of active microorganisms,  
120 *etc.* (Chen et al., 2017). Conversely, cell immobilization provides several advantages  
121 such as, it helps to retain high local concentration of the effective microorganisms, keep  
122 intact bacterial cell membrane stability and can be stored for future reuse (Bhardwaj et  
123 al., 2000). Overall, cell immobilization can markedly improve the stability and  
124 efficiency of the bioremediation process (Mrozik and Piotrowska-Seget, 2010; Tyagi et  
125 al., 2011). Cell immobilization using calcium alginate beads (CABs) is a convenient  
126 option where maximum cells remain viable and can tolerate high concentration of the  
127 toxicant (Lee and Heo, 2000). Moreover, calcium alginate is nontoxic to the bacterial

128 cell and it has low production cost which facilitates easy reuse (Bhardwaj et al., 2000).  
129 Biodegradation of a toxicant (complex nutrient for bacteria) by the microbial  
130 consortium can efficiently enhance biodegradation rate (Kumari et al., 2018). This rate  
131 enhancement could be achieved by several ways such as, different biodegradation  
132 pathways of each individual bacterium (Dutta et al., 2018), a metabolic intermediates of  
133 one bacteria may act as the starting material of other bacteria (Surkatti and El-Naas,  
134 2018), different genetic makeup (Woyke et al., 2006), synergetic effects of different  
135 microbial species, (Ghazali et al., 2004) or by synthesising different variant of catalytic  
136 enzymes. Bacterial cells in the microbial consortium can also combine their metabolic  
137 capabilities to utilize the common complex nutrient (Gilbert et al., 2003).  
138 Biodegradation of complex hydrocarbon mixture by the microbial consortium offers a  
139 combination of diverse enzymes which promotes the biodegradation processes  
140 (Wongwilaiwalin et al., 2010). However, microbial consortium immobilization for  
141 biodegradation of PAHs was not studied previously. The aim of the present study is to  
142 evaluate the naphthalene biodegradation performance by *Pseudomonas putida* strain  
143 KD10 and *Pseudomonas* sp. consortium as a free and immobilized format. Previous  
144 study showed that *Pseudomonas putida* strain KD9 cells decrease in size and shape  
145 from rod to sphere during naphthalene biodegradation and their specific growth rate was  
146 also little slower (Dutta et al., 2018). Keeping this fact in the mind, both morphological  
147 types of bacteria were applied in this present set of study. Additionally, the naphthalene  
148 1, 2-dioxygenase (*nahAc*) was sequenced and analyzed.

149

150

151 *2. Materials and methods*

152 *2.1. Chemicals*

153 Naphthalene was purchased from Sigma-Aldrich chemicals Pvt. Ltd. (USA) and  
154 all other chemicals used for media preparation were procured from HiMedia Laboratory  
155 (Mumbai, India). GC-MS and HPLC grade solvents were procured from Fisher  
156 Scientific (Mumbai, India). Sodium alginate (CAS No. 9005-38-3) of medium viscosity  
157 was purchased from Merck Pvt. Ltd. (USA).

158

159 *2.2. Microorganisms, growth media, growth condition and consortium preparation*

160 Soil samples were collected from petroleum refinery waste sites near Indian Oil  
161 (Haldia, West Bengal, India). The enrichment isolation and strain identification were  
162 carried out according to the standard protocol described previously (Dutta et al., 2017).  
163 Carbon deficient minimum medium (CSM), with a pH of 7.1, was used to cultivate the  
164 bacteria. Naphthalene was used as a sole source of carbon and energy in CSM with  
165 following compositions: 0.2 g L<sup>-1</sup> MgSO<sub>4</sub>, 7H<sub>2</sub>O; 0.08 g L<sup>-1</sup> Ca (NO<sub>3</sub>)<sub>2</sub>, 4H<sub>2</sub>O; 0.005 g  
166 L<sup>-1</sup> FeSO<sub>4</sub>, 7H<sub>2</sub>O; 4.8 g L<sup>-1</sup>, K<sub>2</sub>HPO<sub>4</sub>; 1.2 g L<sup>-1</sup> KH<sub>2</sub>PO<sub>4</sub>. *Pseudomonas putida* strain  
167 KD6 (KX786159.1) and *Pseudomonas putida* strain KD9 (KX786158.1) and the newly  
168 isolated *Pseudomonas putida* strain KD10 (KX786157.1) were used to prepare the  
169 blend of *Pseudomonas* sp. consortium. The consortium was maintained in Luria-  
170 Bertani broth at 31°C with 150 rpm in order to grow the bacterial cell in its normal size  
171 and shape. Alternatively, bacterial cells were grown in CSM with naphthalene as sole  
172 source of carbon and energy to obtain altered morphological variant.

173

174 *2.3. Gene sequence analysis*

175 *2.3.1. Detection of naphthalene 1, 2-dioxygenase and catechol 2, 3-dioxygenase*

176 The conventional polymerase chain reaction (PCR) for naphthalene 1, 2-  
177 dioxygenase (*nahAc*) and catechol 2, 3-dioxygenase (*nahH*) using specific primers  
178 (Table S1) were performed. Additionally, PCR product of *nahAc* was sequenced and  
179 analyzed according to the methods described previously (Dutta et al., 2017).

180

181 *2.3.2. Clustering and phylogenetic analysis*

182 The evolutionary distance of naphthalene 1, 2-dioxygenase among different  
183 bacterial species was analyzed using BLOSUM weighted matrix followed by pairwise  
184 distance computation using MEGA (v7.0) (Kumar et al., 2016). The distance matrix  
185 was then clustered using R (Team, 2013) to create the cladogram and heatmap. The  
186 phylogenetic position of the isolated *Pseudomonas putida* strain KD10 was analyzed  
187 using the previous method (Dutta et al., 2017).

188

189 *2.3.3. Molecular docking*

190 The rigid-body molecular docking was conducted using Auto Dock (v4.2.1)  
191 (Morris et al., 1998). Briefly, the center grid dimensions were set to  
192 20.271×61.989×87.168 with a grid spacing of 0.375 Å. The virtual screening was



193 repeated for 10 times with the unaltered docking parameters having 2.0 Å cluster  
194 tolerance. Additionally, the rigid-flexible molecular docking was performed using  
195 Molecular Operation Environment (Chemical Computing Group, Montreal Inc.,  
196 Canada). The latter scoring function was employed to identify the most favourable  
197 docked poses and to estimate the binding affinity of the protein-ligand complexes. The  
198 non-covalent interactions were analyzed using the previous method (Salentin, S., et al.,  
199 2015).

200

#### 201 *2.4. Enzyme kinetic assay*

202 The enzyme kinetic parameters of the naphthalene 1, 2-dioxygenase<sub>I250, V256</sub> was  
203 performed using the cell-free extract of the *Pseudomonas putida* strain KD10, grown in  
204 250 mL of CSM with naphthalene (500 mg L<sup>-1</sup>) as a sole source of carbon and energy as  
205 described by previously (Dutta et al., 2017).

206

#### 207 *2.4. Detection of solvent efflux pumps system*

208 The detection of solvent efflux pump system (*srpABC*) in *Pseudomonas putida*  
209 strain KD10 was performed using conventional polymerase chain reaction in a thermal  
210 cycler (Mastercycler® nexus gradient, Eppendorf, (Germany). Standard reaction  
211 mixtures were prepared using forward, reverse primers (Table S1) as described  
212 previously (Dutta et al., 2018).

213

214 *2.5. Cell immobilization*

215 *2.5.1. Cell immobilization in calcium alginate beads*

216 *Pseudomonas putida* strain KD10 and *Pseudomonas* sp. consortium were  
217 immobilized according to the standard protocol described previously (Daâssi et al.,  
218 2014). Briefly as sodium alginate was dissolved in 0.9 wt. % NaCl (1 gm in 40 mL 0.9  
219 wt. % NaCl) for 24 h and sterilized by autoclaving (121°C for 15 min). Two grams of  
220 bacterial cell mass was added to 8 ml of NaCl solution and again added to the sterile  
221 alginate solution. The mixture was then gently vortex for complete homogenization and  
222 extruded dropwise through a hypodermic syringe into chilled sterile CaCl<sub>2</sub> solution  
223 (Figure 2). The beads were hardened in the same solution at room temperature with  
224 gentle stirring for 1 h. Finally, the beads were washed several times with 0.9 wt. %  
225 NaCl to remove excess calcium ions and free cells. The beads have an average diameter  
226 of 0.5 mm and stored at 4°C. Sterile beads (without microorganisms) were used to  
227 monitor the abiotic loss of naphthalene. Sodium alginate of medium viscosity  
228 ( $\geq 2,000$  cP) was used to prepare the calcium alginate beads (CABs).

229

230 *2.5.2. Cell viability count*

231 The viable cell enumeration in the CABs was performed by using a protocol  
232 described previously (Usha et al., 2010). In brief, CABs was washed in saline and keep  
233 submerged for 10 min (for saline soaking). Following soaking, the CABs were shaken  
234 with glass beads for 15 min and 1 g CABs were homogenized in 9 ml saline. The saline  
235 was then used for viable cell enumeration onto a nutrient agar plate. Plating was done

236 with this treated saline by series dilution method up to  $10^{-5}$  dilutions on nutrient agar  
237 plates. Plating was also done for the initial CFU count. For every dilution, 10  $\mu$ l of the  
238 solution was plated. Plating was done by the pour plate method. Plates were incubated  
239 at 37°C for 24 h. (Jain and Pradeep, 2005).

240

## 241 *2.6. Scanning electron microscopic (SEM) study*

242 Samples for SEM analysis were prepared by a protocol described elsewhere  
243 (Dutta et al., 2018). The dried samples were coated in a sputter coater (Quorum-  
244 SC7620) under vacuum with a thin gold layer right before SEM analysis using a  
245 scanning electron microscope (Zeiss, EVO 18, Germany) with an accelerating voltage  
246 of 5 kV.

247

## 248 *2.7. Biodegradation kinetics*

### 249 *2.7.1. Biodegradation of naphthalene in the liquid medium*

250 Naphthalene biodegradation study was conducted by the protocol described  
251 previously (Dutta et al., 2017). The conical flasks were incubated at 31°C with 150 rpm  
252 and uninoculated conical flask were used as control. Culture medium was collected at  
253 regular interval of 72 h for degradation and growth kinetic study. Additionally, the  
254 effect of initial concentration of naphthalene (150-2500 mg L<sup>-1</sup>) was studied with  
255 different immobilized systems.

256

257 *2.7.2. Chemical analysis*

258

259 Naphthalene biodegradation was analyzed by using the 1260 infinity series HPLC  
260 system (Agilent, Santa Clara, CA, USA) equipped with Zorbax SB-C18 reversed-phase  
261 column (4.6 × 12.5 mm, 5 μm). The analysis of naphthalene concentrations was  
262 conducted using isocratic elution conditions with the mobile phase 80:20 (v/v)  
263 methanol: water at a flow rate of 1 ml min<sup>-1</sup>. The detection was performed at 254 nm  
264 according to the protocol described in the literature (Dutta et al., 2017). Additionally,  
265 the metabolic intermediates of naphthalene biodegradation were analyzed using the GC-  
266 MS system (GC Trace GC Ultra, MS-Polarisq, Thermo Scientific India Pvt. Ltd)  
267 equipped with a capillary column (TR-WaxMS, 30 m × 0.25 mm [ID] × 0.25 μm film  
268 thickness) by the protocol described elsewhere (Dutta et al., 2017). The entire analysis  
269 was performed in electron ionization, at full scan mode. The metabolite identification  
270 was based on the mass spectra comparison using the NIST Mass Spectral library (v2.0,  
271 2008).

272

273 *2.8. Data analysis*

274 The first-order degradation kinetics model was used to estimate the residual  
275 naphthalene in CSM using equations 1, the algorithms as expressed determine the half-  
276 life ( $t_{1/2}$ ) values of naphthalene in CSM. The substrate inhibition kinetic parameters  
277 were calculated using equation 2.

$$C_t = C_0 \times e^{-kt} \quad [1]$$

278

$$q = q_{max} \frac{S}{K_s + S + S^2/K_i} \quad [2]$$

279

280 The effect of SCS on growth pattern was measured by calculating the difference  
281 between optical densities at 600<sub>nm</sub> and expressed by slight extension (Equation 4) of the  
282 Gomperz's sigmoid growth fit equation (Equation 3).

283

$$y = ae^{-\exp(-k(x-x_c))} \quad [3]$$

284

$$\Delta X_c = X_{c2} - X_{c1} \quad [4]$$

285

286 The growth pattern change by SCS was considered as CFU shift (Equation 5). Where,  
287  $X_{c2}$  = Optical density at  $X_{c2}$  and  $X_{c1}$  = Optical density at  $X_{c1}$ .

$$CFU_{shift} = \Delta X_c \quad [5]$$

288

289 The bacterial growth kinetics were analyzed by applying the Gomperz's model using  
290 Levenberg-Marquardt algorithm in Origin<sup>®</sup> 2016 (California, USA) and the degradation  
291 kinetics were analyzed by using Graphpad Prism<sup>®</sup> 6.01 (San Diego, CA, USA).

292

293 *3. Results and discussion*

294 *3.1. Isolation, identification and growth patterns of NAP degrading bacterial strain*

295 *Pseudomonas putida* strain KD10 was isolated from petroleum refinery waste  
296 with its distinguished colony morphology on CSM agar plate (Figure S1a, b). The PCR  
297 product of 16S rRNA gene of the strain KD10 was sequenced. Moreover, the multiple  
298 sequence alignment followed by phylogenetic assessment suggests that the strain  
299 belongs to the *Pseudomonas putida* group and it showed 99% sequence similarity with  
300 the previously deposited sequences of *Pseudomonas putida* (Figure S2). The 16S rRNA  
301 gene sequence was deposited at NCBI (<https://www.ncbi.nlm.nih.gov/>) under the  
302 GenBank accession number KX786157.1.

303 Naphthalene biodegradation by the *Pseudomonas putida* KD10 was  
304 preliminarily confirmed by the catechol test (Figure S1C) followed by growth pattern  
305 analysis in CSM with naphthalene as a sole source of carbon and energy. Additionally,  
306 growth pattern with 0.5 gm % sucrose as a secondary carbon supplement (SCS) was  
307 compared with growth pattern of non-supplemented CSM. Gompertz's model fit  
308 (Equation 3) was used to analyze the growth curve (Table S4).

309

310 *3.2. Pseudomonas sp. consortium, growth pattern and NAP biodegradation*

311 The growth pattern of the *Pseudomonas sp.* consortium, as shown in Figure 1  
312 was optimized at 31°C and pH 7.1 which reveal successful cooperation among  
313 *Pseudomonas putida* strain KD6, KD9 and KD10. Further, the growth curve model  
314 indicates a significant increase in total biomass of the *Pseudomonas sp.* consortium and  
315 they also showed a high concentration of naphthalene tolerance potential.

316

317 *3.3. Gene sequence and phylogenetic analysis*

318 Naphthalene 1, 2-dioxygenase (*nahAc*), encoded by *Pseudomonas putida* strain  
319 KD10 have only two point mutations at I250, and V256 which were replaced by  
320 methionine and glycine respectively (Figure 3A, S6). However, additional mutations  
321 were found in the same chain A at K200, A210, E264, M284 and N334 by replacing  
322 glutamic acid, glycine, aspartic acid, isoleucine, respectively (Dutta et al. 2017, 2018).  
323 The three dimensional structural analysis suggests that the mutations at 200, 210, 284  
324 and 334 causes a little structural change in comparison to the wild type variant of  
325 naphthalene 1, 2-dioxygenase (Figure 3B). Conversely, the amino acids stretch at the  
326 close proximity of the active site residues exactly from 248 to 266 showed a structural  
327 mismatch among all three mutant and wild type variants of naphthalene 1, 2-  
328 dioxygenase (Figure 3B). The active site of an enzyme tends to evolve fast to attain its  
329 maximum performance and functionality in a particular environment (James and  
330 Tawfik, 2003).

331 The alteration of amino acids bases from 248 to 266 of chain A, was a common  
332 feature in all three mutant variants of *nahAc* and this particular stretch of amino acid is  
333 very close to the active site residues (Figure 3C). This implies that the “248-266” amino  
334 acid stretch is highly prone to mutation and it may influence on the enzymatic efficiency  
335 and environmental adaptability. Thus, our study provides a new insight, which could be  
336 beneficial for rational approaches of enzyme redesigning.

337 The biodegradation performance of a bacterial strain is linked with the three  
338 dimensional structure of the catalytic enzyme and ligand binding posture (Singh et al.,  
339 2019). Moreover, alteration of a single amino acid in the catalytic domain of the enzyme  
340 caused different ligand binding postures which eventually lead to a unique

341 biodegradation pathways (Ferraro et al., 2006). In addition, site directed mutagenesis in  
342 the catalytic domain offers superior enzyme activity (Parales et al., 1999; Parales,  
343 2003). The comparative analysis of binding free energy helps to comprehend the  
344 superior naphthalene biodegradation performance by the *Pseudomonas* sp. consortium,  
345 which is, in fact, the summative activity of all three mutant variants of naphthalene 1, 2-  
346 dioxygenase.

347         The evolutionary trace on the naphthalene 1, 2-dioxygenase among different  
348 species were studied through pairwise distance matrix analysis (Figure 4), which  
349 suggests a significant intra and inter species difference among *Sphingopyxis* sp.,  
350 *Croceicoccus naphthovorans*, *Burkholderia multivorans*, *Burkholderia* sp. *Massilis* sp.  
351 and *Cycloclasticus* sp. Conversely, other *Pseudomonas* sp. particularly, *Pseudomonas*  
352 *benzenivorans*, *Pseudomonas balearica*, *Pseudomonas stutzeri*, *Pseudomonas*  
353 *kunmingensis*, *Pseudomonas frederikbergensis* have similarities in their version of  
354 naphthalene 1, 2-dioxygenase. A few other species such as *Xenophilusa zovorans*,  
355 *Ralsoniam annitolilytica*, and *Paraburkholderia aromaticivorans* does not show  
356 significant evolutionary distance in their version of naphthalene 1, 2-dioxygenase  
357 (Figure 4). However, a few strains of *Burkholderia multivorans* showed similarities  
358 and some other does not (Figure 4). The source of collection of these two *Burkholderia*  
359 *multivorans* species may be the reason for such variation (Li et al., 2007). In a study by  
360 (Su et al., 2016), the epigenetic impacts on the metabolic enzymes have been suggested.  
361 Moreover, the divergence of evolutionary distances of the same enzyme between  
362 different and same bacterial species indicates thrive in a particular microenvironment.  
363 However, further studies are needed to identify the underlying cause and mechanisms of  
364 such variation intra-species variation.



365

### 366 3.4. Molecular docking

367 The result depicted from the rigid body molecular docking, suggests *nahAc*-  
368 KD10<sub>I250, V256</sub> mutant has a little higher binding free energy than that of mutant *nahAc*  
369 encoded by KD9 but little lower than the *nahAc* mutant variant encoded by the KD6  
370 (Table 1). However, the rigid-flexible molecular docking using MOE algorithms  
371 showed *nahAc* I<sub>250</sub>, G<sub>256</sub> mutant variant has  $\Delta G_{\text{London}}$  of  $-7.1 \text{ kcal mol}^{-1}$  and  $\Delta G_{\text{GBVI/WSA}}$   
372 of  $-1.68 \text{ kcal mol}^{-1}$ , which is little higher than other two mutant variants of *nahAc*  
373 encoded by KD6 and KD9 (Table 1). The interacting amino acid residues in the active  
374 site were confined to be quite same in three mutant variants, except one variation, *i.e.*,  
375 His<sub>208</sub> which is located about 5.49 Å away from the bicyclic ring of naphthalene (Figure  
376 3D). The altered binding free energy of the *nahAc*-KD10<sub>I250, V256</sub> may be due to the fact  
377 that the two altered amino acid residues reside in “248-266” and participation of His<sub>208</sub>  
378 as a unique interacting residue (Figure 3C). Furthermore, the non-covalent interactions  
379 of the *nahAc*-KD10<sub>I250, V256</sub> with naphthalene, phenanthrene and anthracene suggest that  
380 Phn 352 was common residue and His 208 is involve in  $\pi$ - stacking with a bond angle of  
381  $80.58^\circ$  and  $77.19^\circ$  respectively for naphthalene and anthracene (Table S5).

382

### 383 3.5. Enzyme kinetic assay

384 Enzyme activity by cell free extract of *Pseudomonas putida* KD10 was studied  
385 using Naphthalene as substrate. The cell free extract of strain KD10 degraded  
386 Naphthalene, with  $R^2$  of 0.935 indicating the experimental data are well correlated with  
387 the model (Table 2). The performance constant ( $K_{\text{cat}}/K_{\text{m}}$ ) was  $0.142 \times 10^3 \text{ ml}^{-1} \text{ mol}^{-1} \text{ s}^{-1}$   
388 which further validate the chemical data obtained from chemical analysis (Table 1). In

389 previous study, the performance constant of *Pseudomonas putida* KD6 was little higher  
390 than *Pseudomonas putida* strain KD10, suggesting the six altered amino acid residues of  
391 the mutant naphthalene 1,2-dioxygenase of the KD6 may be main cause of this  
392 difference (Dutta et al. 2017). The performance constant ( $K_{cat}/K_m$ ) is the indicator of  
393 the performance of an enzyme and usually the higher  $K_{cat}/K_m$  meaning better  
394 enzymatic performance (Koshland Jr DE, 2002).

395

### 396 3.6. Detection of solvent efflux system

397 The cellular microenvironment and internal homeostasis are crucial for  
398 maintaining normal cellular functions and cell tends to adopt several strategies in order  
399 to achieve it (Blanco et al., 2016). One such adaptation strategy is the solvent efflux  
400 pump system, that control intracellular toxicity to some extent (Kusumawardhani et al.,  
401 2018). The role of *srpABC* solvent efflux pump system in the biodegradation of PAHs  
402 are common in literature (Bugg et al., 2000). Besides the other cellular activities,  
403 *srpABC* also assist in gaining antimicrobial resistance (Schweizer, 2003).  
404 Biodegradation studies on chlorpyrifos indicate that the intermediates formed during  
405 biodegradation, act as an antimicrobial agent to other species, meaning that the  
406 metabolic intermediates may have a role on inter-species competition in a particular  
407 micro-environment to thrive in nutrient-limiting condition (Anwar et al., 2009), (Raes  
408 and Bork, 2008). Besides, the role of *srpABC* on biodegradation enhancement process  
409 is still poorly understood. The presence of *srpABC* in *Pseudomonas putida* strain KD10  
410 (Figure S5) and the efficient naphthalene biodegradation property can be interlinked  
411 (Dutta et al., 2018).

412

413 3.7. Cell immobilization and viability count

414 The viscosity of CABs determines its efficiency of the immobilization and its  
415 performance of detoxification of environmental pollutant (Young et al., 2006).  
416 Therefore, sodium alginates of medium viscosity were chosen for this study. The  
417 efficiency of cell immobilization in CABs was evaluated by enumeration of viable cells  
418 (Table S3). Bacteria immobilized in CABs do not significantly lose its viable biomass  
419 after 21 days of incubation at 4°C.

420

421 3.8. Naphthalene biodegradation studies

422 3.8.1 By free *Pseudomonas putida* strain KD10

423 Biodegradation kinetics of naphthalene (500 mg L<sup>-1</sup>) by the *Pseudomonas putida*  
424 strain KD10 was first tested to determine its naphthalene biodegradation potential  
425 (Figure 4). It was found that after 12 days of incubation at 31°C the amount of residual  
426 naphthalene reduced significantly ( $p < 0.05$ ) (Figure 5). Results are also summarised at  
427 Table 3 along with names of the immobilized systems. The first order degradation  
428 kinetic data suggest that at the end of the incubation *Pseudomonas putida* strain KD10  
429 efficiently decompose 95.22 % naphthalene in CSM as a sole source of carbon and  
430 energy. The values of degradation rate constant ( $k$ ) and half-life ( $t_{1/2}$ ) were 0.2193 and  
431 3.1 days with  $R^2$  of 0.981. In the previous study, 99.1 % of initial naphthalene was  
432 removed within 96 h by strain *Bacillus fusiformis* (BFN). However, the initial  
433 concentration was very low (50 mg L<sup>-1</sup> of initial naphthalene) (Lin et al., 2010).

434 After confirmation of naphthalene biodegradation potential of *Pseudomonas*  
435 *putida* strain KD10, the stain was allowed to grow in association with other two strains  
436 of *Pseudomonas putida*, namely *Pseudomonas putida* strain KD6 and *Pseudomonas*

437 *putida* strain KD9 (Dutta et al., 2017; Dutta et al., 2018). These two strains were  
438 selected to develop the blend of *Pseudomonas* sp. consortium, because they were  
439 collected from different isolation points, they encode different variant of *nahAc* and  
440 they have common optimized growth parameters (temperature 31°C and pH 7.1) (Dutta  
441 et al., 2017 & Dutta et al., 2018). Further, *Pseudomonas putida* strain KD6 encodes a  
442 six point mutant *nahAc* with the capability to co-degrade high concentration of  
443 naphthalene, phenanthrene (PHN) and pyrene (PYR), (500 mg L<sup>-1</sup> each). Moreover, the  
444 stain KD9 encodes a four point mutant variant of *nahAc* with rhamnolipid production  
445 capabilities (Dutta et al. 2018).

446         In the previous study,  $t_{1/2}$  of naphthalene co-biodegradation with phenanthrene  
447 and pyrene by *Pseudomonas putida* strain KD6 was 4.1 days, which was significantly  
448 reduced to 2.2 days when bacterial cells were allowed to grow as *Pseudomonas* sp.  
449 consortium with only naphthalene (Table 3). Further, this value was found as 2.7 days  
450 for *Pseudomonas putida* KD9, suggesting *Pseudomonas putida* strain KD6 might face  
451 some sort of substrate inhibition by the co-presence PHN and PYR in the system (Jiang  
452 et al., 2018) and the cooperative nature of the *Pseudomonas* sp. consortium helps to  
453 enhance the naphthalene bio-utilization. The microbial consortium works several ways,  
454 *viz.*, by the division of labor, cross-feeding, *etc.* (Smid and Lacroix, 2013). Moreover, a  
455 successful consortium could also overcome shortcomings of single bacteria (Bhatia et  
456 al., 2018). However, it is a fact that, bacteria select PAH among mixed PAHs based on  
457 their structural simplicity first (Dutta et al., 2017) and the velocity could be optimized  
458 by reducing the initial concentration of the PAHs gradually according to the structural  
459 simplicity (Jiang et al., 2018).

460

461 3.8.2. *By immobilized Pseudomonas sp. consortium*

462 The biodegradation kinetic of naphthalene by individual *Pseudomonas putida*  
463 strain KD6, KD9, KD10 and *Pseudomonas sp. consortium* immobilized in CABs,  
464 depicted further enhancement of overall naphthalene bio-utilization (Table 3). Cell  
465 immobilization using hydrogel, such as CAB found to be advantageous rather than free  
466 cells (Hameed and Ismail, 2018).

467 This phenomenon may be attributable due to the increased level of tightness of  
468 the cross-linked polymers of the calcium alginate beads that render bacteria adequate  
469 amount of protection from harsh environment (Chen et al., 2013). However, the free  
470 bacterial cell lacks the capabilities to degrade a high initial concentration of the toxicant  
471 because they followed the conventional growth phases (Marrot et al., 2006). In addition,  
472 exposure of free bacterial cells to the high initial concentration of toxicants may  
473 challenge them to experience shock-concentration (Zhao et al., 2006). Conversely, cells  
474 immobilized in calcium alginate beads can tolerate high concentration of the toxicant  
475 and decrease the lag phase duration (Kao et al., 2014). Moreover, the diffusion  
476 limitation natures of the CABs matrix provide a high local concentration of the cell  
477 population (Bezbaruah et al., 2009). Furthermore, CABs provides remarkable stability  
478 and reusable features that effectively reduces the production cost (Daâssi et al., 2014).

479 Biodegradation of naphthalene by immobilized *Pseudomonas sp. consortium*  
480 significantly elevated the overall naphthalene bio-utilization efficiency with  $t_{1/2}$  and  $R^2$   
481 values of 2 days and 0.998 respectively, suggesting experimental data are well  
482 correlated to the model (Table 3). The individual cell population also displayed  
483 improved biodegradation efficiency. However, the biodegradation efficiency was  
484 maximum by *Pseudomonas putida* strain KD6, which showed a marked reduction of  $t_{1/2}$

485 from 4.1 to 3.0 days (Table 3). It promptly suggests that CABs facilitate KD6 optimized  
486 naphthalene bio-utilization, that might be masked-up by the co-presence of NAP, PHN,  
487 PYR (Jiang et al., 2018). However, further studies are required to investigate  
488 behavioural patterns of a consortium with mixed PAH.

489

490 Bacterial cell grown on CSM with naphthalene as a sole source of carbon and  
491 energy showed a delayed growth rate and their total biomass was also low (Figure 1).  
492 Nevertheless, growing cells on CSM prior to immobilization in CABs provide them  
493 essential adaptation to the toxicant and mature them for such stress condition (Table 3).  
494 Immobilized cell system was useful for bioremediation of a toxicant after prior  
495 adaptation to the surrounding environment (Partovinia and Rasekh, 2018). However,  
496 growing cells in Luria-Bertani broth does not adapt cell adequately, and their  
497 naphthalene removal performance was very poor (Figure S3). The inoculum was  
498 normalized ( $OD_{600nm} = 0.002$ ) for each *Pseudomonas putida* strain in order to prepare  
499 the *Pseudomonas* sp. consortium. In aqueous medium, the immobilized bacterial cell  
500 mainly on the surface was exposed to naphthalene and primarily involved in the  
501 naphthalene bio-utilization process. However, due to the micro-porous feature of the  
502 calcium alginate beads, microbial cells immobilized other than surface are also  
503 participates in the bio-utilization and bio-sorption process of naphthalene. Further, with  
504 time due to the mechanical force generated by shaking, a few microbial cells may  
505 release from the calcium alginate beads. However, to fuel up the cell, it is necessary to  
506 uptake naphthalene for bio-utilization through step by step intracellular enzymatic  
507 reactions (Lin et al., 2014).

508

509

510 *3.8.3. Effect of initial naphthalene concentration on biodegradation kinetics*

511 The effect of different initial concentration of naphthalene (150 – 2500 mg L<sup>-1</sup>)  
512 on degradation kinetics was evaluated with immobilized KD6, KD9, and KD10 as  
513 individual and as a consortium (Table S2). The results suggest cell immobilization in  
514 CABs facilitates bacteria to cope with a high initial concentration of NAP (Table S2).  
515 The substrate inhibition kinetic parameters, *viz.*, the maximum specific degradation rate  
516 ( $q_{\max}$ ), and inhibition constant ( $k_i$ ) were highest for immobilized *Pseudomonas* sp.  
517 consortium and these values were 0.707 h<sup>-1</sup> and 1475 mg L<sup>-1</sup> respectively (Table S2).  
518 However, we did not find any significant change on half saturation constant ( $k_s$ ),  
519 suggesting the reaction does not depend on its initial concentration and the  
520 biodegradation process follows pseudo-first order reaction kinetics. In previous study,  
521 free *Pseudomonas putida* KD9 in CSM was capable to tolerate relatively low initial  
522 concentration of naphthalene with  $k_i$  value of 1107 mg L<sup>-1</sup> and addition of sucrose as  
523 SCS provides quite similar potential of naphthalene tolerance ( $k_i$  of 1429 mg L<sup>-1</sup>) with  
524 that of immobilized *Pseudomonas* sp. consortium (Dutta et al., 2018). However, sucrose  
525 (0.5 gm. %) in the mobile open water system would not be beneficial for bacteria to  
526 overcome the high shock concentration of the toxicant, again suggesting cell  
527 immobilization and development of effective microbial consortium as systematic  
528 optimization of biodegradation process.

529 *3.9. Detection of metabolic end products*

530 The metabolic pathway of naphthalene biodegradation that might be followed by  
531 *Pseudomonas putida* strain KD10 was elucidated through GCMS analysis of the

532 metabolites (Figure S4). In the previous study, the major metabolites were restricted to  
533 be salicylaldehyde, catechol, D-gluconic acid and pyruvic acid (Dutta et al., 2018).  
534 However, in the present study, we have detected salicylic acid as an additional  
535 metabolite (Table 4). Catechol step into the TCA cycle by two possible pathways one is  
536 ortho-cleavage and another is meta-cleavage pathway. The meta-cleavage pathway is  
537 led by catechol-2, 3-dioxygenase (*nahH*), and presence of *nahH* (Figure S5) suggesting  
538 in *Pseudomonas putida* strain KD10 opt the meta-cleavage pathway. Furthermore, we  
539 assume that D-gluconic acid enters in the bio-conversion of naphthalene, possibly from  
540 glucose as a precursor (Figure 6) and it is finally converted to pyruvate via aldolase. D-  
541 gluconic acid implies impotence between bacteria-plant mutualistic association e.g.,  
542 induction of phosphate solubilization processes (Rodriguez et al., 2004) which can  
543 inhibit fungal growth (Kaur et al., 2006). The metabolic intermediates viz., salicylic  
544 acid, catechol has plant-growth promoting activity (Lee et al., 2010) e.g., the antioxidant  
545 property of the catechol help and promotes seed germination (Schweigert et al., 2001).  
546 The presence of d-gluconic acid as a major metabolite and its subsequent entry in TCA  
547 cycle from glucose precursor, suggest that KD10 may be able to sequestered catechol upon  
548 needs to promote the plants' growth (Figure 6).

549

#### 550 4. Conclusion

551

552 Naphthalene biodegradation by free and immobilized *Pseudomonas putida*  
553 strain KD10 and *Pseudomonas* sp. consortium were studied. HPLC analysis showed  
554 80.1% of initial naphthalene (500 mg L<sup>-1</sup>) was utilized by immobilized *Pseudomonas*



555 sp. consortium after 72 h of incubation. Further, initial naphthalene tolerance by  
556 immobilized *Pseudomonas* sp. consortium was highest (1475 mg L<sup>-1</sup>) with maximum  
557 specific degradation of 0.707 h<sup>-1</sup>. The gene sequence analysis of the naphthalene 1, 2-  
558 dioxygenase suggests a significant evolutionary distance among different microbial  
559 species and in few cases, intra-species variation was observed. A common mutation  
560 prone amino acid stretch inside Chain A of all three natural mutant variants of  
561 naphthalene 1, 2-dioxygenase were found at close proximity of the active site. Further,  
562 the rigid-flexible molecular docking showed better binding free energy of the mutant  
563 variant encoded by *Pseudomonas putida* strain KD10 than that of wild-type variant of  
564 naphthalene 1,2-dioxygenase. This common mutation prone amino acid stretch could  
565 aid the rational approaches of enzyme redesigning. Overall, this study summarises the  
566 application of bacterial cell immobilization in calcium alginate beads and development  
567 of the microbial consortium together for enhanced naphthalene biodegradation.  
568 However, further studies are required for the systematic optimization of naphthalene  
569 biodegradation in a real environment.

570

#### 571 *Authors Contributions*

572 KD and CG conceive the main hypothesis. KD design, performed all  
573 experiments, and wrote the manuscript. SS, IK, SB, DJ assisted KD in some  
574 experiments. MK, TM, PR, KCG performed the statistical analysis and wrote the  
575 manuscript. CG critically proofread and wrote the manuscript. All authors read the  
576 manuscript.

577

578 *Funding*

579 University Grant Commission (UGC) Govt. of India, New Delhi, India (Grant  
580 No. VU/Innovative/Sc/17/2015).

581

582 *Acknowledgement*

583 University Grant Commission (UGC) Govt. of India, New Delhi, India (Grant  
584 No. VU/Innovative/Sc/17/2015) is acknowledged by C.G. K.D. acknowledges Council  
585 of Scientific and Industrial Research (CSIR), Govt. of India, New Delhi, India for  
586 Senior Research Fellowship (SRF) sanction letter no. 09/599 (0082) 2K19 EMR-Z  
587 dated: 29/03/2019.

588

589 *Conflict of Interest*

590 The authors declare that they have no conflict of interests.

591

592 *References*

593 Anwar, S., Liaquat, F., Khan, Q.M., Khalid, Z.M., and Iqbal, S. (2009). Biodegradation  
594 of chlorpyrifos and its hydrolysis product 3, 5, 6-trichloro-2-pyridinol by  
595 *Bacillus pumilus* strain C2A1. *Journal of Hazardous Materials* 168(1), 400-405.

596 Bernstein, H.C., Paulson, S.D., and Carlson, R.P. (2012). Synthetic *Escherichia coli*  
597 consortia engineered for syntrophy demonstrate enhanced biomass productivity.  
598 *Journal of biotechnology* 157(1), 159-166.

599 Bezbaruah, A.N., Krajangpan, S., Chisholm, B.J., Khan, E., and Bermudez, J.J.E.  
600 (2009). Entrapment of iron nanoparticles in calcium alginate beads for  
601 groundwater remediation applications. *Journal of Hazardous Materials* 166(2-  
602 3), 1339-1343.

- 603 Bhardwaj, T.R., Kanwar, M., Lal, R., and Gupta, A. (2000). Natural gums and modified  
604 natural gums as sustained-release carriers. *Drug development and industrial*  
605 *pharmacy* 26(10), 1025-1038.
- 606 Bhatia, S.K., Bhatia, R.K., Choi, Y.-K., Kan, E., Kim, Y.-G., and Yang, Y.-H. (2018).  
607 Biotechnological potential of microbial consortia and future perspectives.  
608 *Critical reviews in biotechnology* 38(8), 1209-1229.
- 609 Blanco, P., Hernando-Amado, S., Reales-Calderon, J., Corona, F., Lira, F., Alcalde-  
610 Rico, M., et al. (2016). Bacterial multidrug efflux pumps: much more than  
611 antibiotic resistance determinants. *Microorganisms* 4(1), 14.
- 612 Bruce, R.M., Haber, L., and McClure, P. (1998). *Toxicological Review of Naphthalene*  
613 *(CAS No. 91-20-3): In Support of Summary Information on the Integrated Risk*  
614 *Information System (IRIS)*. US Environmental Protection Agency, National  
615 Center for Environmental Assessment.
- 616 Bugg, T., Foght, J.M., Pickard, M.A., and Gray, M.R. (2000). Uptake and active efflux  
617 of polycyclic aromatic hydrocarbons by *Pseudomonas fluorescens* LP6a.  
618 *Applied and environmental microbiology* 66(12), 5387-5392.
- 619 Chen, D.-Z., Fang, J.-Y., Shao, Q., Ye, J.-X., Ouyang, D.-J., and Chen, J.-M. (2013).  
620 Biodegradation of tetrahydrofuran by *Pseudomonas oleovorans* DT4  
621 immobilized in calcium alginate beads impregnated with activated carbon fiber:  
622 mass transfer effect and continuous treatment. *Bioresource technology* 139, 87-  
623 93.
- 624 Chen, Q., Li, J., Liu, M., Sun, H., and Bao, M. (2017). Study on the biodegradation of  
625 crude oil by free and immobilized bacterial consortium in marine environment.  
626 *PloS one* 12(3), e0174445.
- 627 Daâssi, D., Rodríguez-Couto, S., Nasri, M., and Mechichi, T. (2014). Biodegradation of  
628 textile dyes by immobilized laccase from *Corioloopsis gallica* into Ca-alginate  
629 beads. *International Biodeterioration & Biodegradation* 90, 71-78.
- 630 Dutta, K., Shityakov, S., Das, P.P., and Ghosh, C. (2017). Enhanced biodegradation of  
631 mixed PAHs by mutated naphthalene 1,2-dioxygenase encoded by *Pseudomonas*  
632 *putida* strain KD6 isolated from petroleum refinery waste. *3 Biotech* 7(6), 365.  
633 doi: 10.1007/s13205-017-0940-1.
- 634 Dutta, K., Shityakov, S., Khalifa, I., Mal, A., Moulik, S.P., Panda, A.K., et al. (2018).  
635 Effects of secondary carbon supplement on biofilm-mediated biodegradation of  
636 naphthalene by mutated naphthalene 1, 2-dioxygenase encoded by *Pseudomonas*  
637 *putida* strain KD9. *Journal of Hazardous Materials* 357, 187-197. doi:  
638 <https://doi.org/10.1016/j.jhazmat.2018.05.024>.

- 639 Ferraro, D.J., Okerlund, A.L., Mowers, J.C., and Ramaswamy, S. (2006). Structural  
640 basis for regioselectivity and stereoselectivity of product formation by  
641 naphthalene 1, 2-dioxygenase. *Journal of Bacteriology* 188(19), 6986-6994.
- 642 Ghazali, F.M., Rahman, R.N.Z.A., Salleh, A.B., and Basri, M. (2004). Biodegradation  
643 of hydrocarbons in soil by microbial consortium. *International Biodeterioration  
644 & Biodegradation* 54(1), 61-67.
- 645 Gilbert, E., Walker, A., and Keasling, J. (2003). A constructed microbial consortium for  
646 biodegradation of the organophosphorus insecticide parathion. *Applied  
647 microbiology and biotechnology* 61(1), 77-81.
- 648 Hameed, B.B., and Ismail, Z.Z. (2018). Decolorization, biodegradation and  
649 detoxification of reactive red azo dye using non-adapted immobilized mixed  
650 cells. *Biochemical Engineering Journal* 137, 71-77.
- 651 James, L.C., and Tawfik, D.S. (2003). Conformational diversity and protein evolution—a  
652 60-year-old hypothesis revisited. *Trends in biochemical sciences* 28(7), 361-368.
- 653 Jiang, Y., Zhang, Z., and Zhang, X. (2018). Co-biodegradation of pyrene and other  
654 PAHs by the bacterium *Acinetobacter johnsonii*. *Ecotoxicology and  
655 environmental safety* 163, 465-470.
- 656 Kao, P.-M., Hsu, B.-M., Huang, K.-H., Tao, C.-W., Chang, C.-M., and Ji, W.-T. (2014).  
657 Biohydrogen production by immobilized co-culture of *Clostridium butyricum*  
658 and *Rhodospseudomonas palustris*. *Energy Procedia* 61, 834-837.
- 659 Kaur, R., Macleod, J., Foley, W., and Nayudu, M. (2006). Gluconic acid: An antifungal  
660 agent produced by *Pseudomonas* species in biological control of take-all.  
661 *Phytochemistry* 67(6), 595-604.
- 662 Koshland Jr DE. (2002). The application and usefulness of the ratio  $k_{cat}/K_M$ .  
663 *Bioorganic chemistry*. 30(3), 211-3. doi: <https://doi.org/10.1006/bioo.2002.1246>
- 664 Kumar, S., Stecher, G., and Tamura, K. (2016). MEGA7: molecular evolutionary  
665 genetics analysis version 7.0 for bigger datasets. *Molecular biology and  
666 evolution* 33(7), 1870-1874.
- 667 Kumari, S., Regar, R.K., and Manickam, N. (2018). Improved polycyclic aromatic  
668 hydrocarbon degradation in a crude oil by individual and a consortium of  
669 bacteria. *Bioresource technology* 254, 174-179.
- 670 Kusumawardhani, H., Hosseini, R., and de Winde, J.H. (2018). Solvent tolerance in  
671 bacteria: fulfilling the promise of the Biotech Era? *Trends in biotechnology*.
- 672 Lee, K.-Y., and Heo, T.-R. (2000). Survival of *Bifidobacterium longum* Immobilized in  
673 calcium alginate beads in simulated gastric juices and bile salt solution. *Applied  
674 and environmental microbiology* 66(2), 869-873.

- 675 Lee, S., Kim, S.G., and Park, C.M. (2010). Salicylic acid promotes seed germination  
676 under high salinity by modulating antioxidant activity in Arabidopsis. *New*  
677 *Phytologist* 188(2), 626-637.
- 678 Li, X., He, J., and Li, S. (2007). Isolation of a chlorpyrifos-degrading bacterium,  
679 *Sphingomonas* sp. strain Dsp-2, and cloning of the mpd gene. *Research in*  
680 *Microbiology* 158(2), 143-149.
- 681 Lin, C., Gan, L., and Chen, Z.-L. (2010). Biodegradation of naphthalene by strain  
682 *Bacillus fusiformis* (BFN). *Journal of Hazardous Materials* 182(1-3), 771-777.
- 683 Lin, C., Gan, L., Chen, Z., Megharaj, M., and Naidu, R. (2014). Biodegradation of  
684 naphthalene using a functional biomaterial based on immobilized *Bacillus*  
685 *fusiformis* (BFN). *Biochemical Engineering Journal* 90, 1-7.
- 686 Marrot, B., Barrios-Martinez, A., Moulin, P., and Roche, N. (2006). Biodegradation of  
687 high phenol concentration by activated sludge in an immersed membrane  
688 bioreactor. *Biochemical Engineering Journal* 30(2), 174-183.
- 689 Morris, G.M., Goodsell, D.S., Halliday, R.S., Huey, R., Hart, W.E., Belew, R.K., et al.  
690 (1998). Automated docking using a Lamarckian genetic algorithm and an  
691 empirical binding free energy function. *Journal of computational chemistry*  
692 19(14), 1639-1662.
- 693 Mrozik, A., and Piotrowska-Seget, Z. (2010). Bioaugmentation as a strategy for  
694 cleaning up of soils contaminated with aromatic compounds. *Microbiological*  
695 *research* 165(5), 363-375.
- 696 Norris, R.D. (2017). "In-situ bioremediation of soils and ground water contaminated  
697 with petroleum hydrocarbons," in *Handbook of Bioremediation (1993)*. CRC  
698 Press), 17-38.
- 699 Parales, R.E. (2003). The role of active-site residues in naphthalene dioxygenase.  
700 *Journal of Industrial Microbiology and Biotechnology* 30(5), 271-278.
- 701 Parales, R.E., Parales, J.V., and Gibson, D.T. (1999). Aspartate 205 in the catalytic  
702 domain of naphthalene dioxygenase is essential for activity. *Journal of*  
703 *Bacteriology* 181(6), 1831-1837.
- 704 Partovinia, A., and Rasekh, B. (2018). Review of the immobilized microbial cell  
705 systems for bioremediation of petroleum hydrocarbons polluted environments.  
706 *Critical Reviews in Environmental Science and Technology* 48(1), 1-38.
- 707 Raes, J., and Bork, P. (2008). Molecular eco-systems biology: towards an understanding  
708 of community function. *Nature Reviews Microbiology* 6(9), 693.

- 709 Rodriguez, H., Gonzalez, T., Goire, I., and Bashan, Y. (2004). Gluconic acid production  
710 and phosphate solubilization by the plant growth-promoting bacterium  
711 *Azospirillum* spp. *Naturwissenschaften* 91(11), 552-555.
- 712 Schweigert, N., Zehnder, A.J., and Eggen, R.I. (2001). Chemical properties of catechols  
713 and their molecular modes of toxic action in cells, from microorganisms to  
714 mammals: minireview. *Environmental microbiology* 3(2), 81-91.
- 715 Schweizer, H.P. (2003). Efflux as a mechanism of resistance to antimicrobials in  
716 *Pseudomonas aeruginosa* and related bacteria: unanswered questions. *Genet Mol*  
717 *Res* 2(1), 48-62.
- 718 Singh, N.S., Sharma, R., and Singh, D.K. (2019). Identification of enzyme (s) capable  
719 of degrading endosulfan and endosulfan sulfate using in silico techniques.  
720 *Enzyme and Microbial Technology* 124, 32-40.
- 721 Smid, E.J., and Lacroix, C. (2013). Microbe–microbe interactions in mixed culture food  
722 fermentations. *Current opinion in biotechnology* 24(2), 148-154.
- 723 Su, X., Wellen, K.E., and Rabinowitz, J.D. (2016). Metabolic control of methylation  
724 and acetylation. *Current opinion in chemical biology* 30, 52-60.
- 725 Surkatti, R., and El-Naas, M. (2018). Competitive interference during the  
726 biodegradation of cresols. *International Journal of Environmental Science and*  
727 *Technology* 15(2), 301-308.
- 728 Team, R.C. (2013). R: A language and environment for statistical computing.
- 729 Thomé, A., Reginatto, C., Vanzetto, G., and Braun, A.B. (Year). "Remediation  
730 Technologies Applied in Polluted Soils: New Perspectives in This Field", in:  
731 *The International Congress on Environmental Geotechnics*: Springer), 186-203.
- 732 Tyagi, M., da Fonseca, M.M.R., and de Carvalho, C.C. (2011). Bioaugmentation and  
733 biostimulation strategies to improve the effectiveness of bioremediation  
734 processes. *Biodegradation* 22(2), 231-241.
- 735 Usha, M., Sanjay, M., Gaddad, S., and Shivannavar, C. (2010). Degradation of h-acid  
736 by free and immobilized cells of *Alcaligenes latus*. *Brazilian Journal of*  
737 *Microbiology* 41(4), 931-945.
- 738 Wang, L., Zhang, S., Wang, L., Zhang, W., Shi, X., Lu, X., et al. (2018). Concentration  
739 and risk evaluation of polycyclic aromatic hydrocarbons in urban soil in the  
740 typical semi-arid city of Xi'an in Northwest China. *International journal of*  
741 *environmental research and public health* 15(4), 607.
- 742 Wilson, S.C., and Jones, K.C. (1993). Bioremediation of soil contaminated with  
743 polynuclear aromatic hydrocarbons (PAHs): a review. *Environmental pollution*  
744 81(3), 229-249.

- 745 Wongwilaiwalin, S., Rattanachomsri, U., Laothanachareon, T., Eurwilaichitr, L.,  
746 Igarashi, Y., and Champreda, V. (2010). Analysis of a thermophilic  
747 lignocellulose degrading microbial consortium and multi-species  
748 lignocellulolytic enzyme system. *Enzyme and Microbial Technology* 47(6), 283-  
749 290.
- 750 Woyke, T., Teeling, H., Ivanova, N.N., Huntemann, M., Richter, M., Gloeckner, F.O.,  
751 et al. (2006). Symbiosis insights through metagenomic analysis of a microbial  
752 consortium. *Nature* 443(7114), 950.
- 753 Young, C.C., Rekha, P., Lai, W.A., and Arun, A. (2006). Encapsulation of plant  
754 growth-promoting bacteria in alginate beads enriched with humic acid.  
755 *Biotechnology and bioengineering* 95(1), 76-83.
- 756 Zhao, X., Wang, Y., Ye, Z., Borthwick, A.G., and Ni, J. (2006). Oil field wastewater  
757 treatment in biological aerated filter by immobilized microorganisms. *Process*  
758 *Biochemistry* 41(7), 1475-1483.
- 759
- 760
- 761
- 762
- 763
- 764
- 765
- 766
- 767
- 768
- 769
- 770
- 771
- 772
- 773

774 *Figure legends*

775 **Figure 1.** Growth kinetic model of *Pseudomonas putida* and *Pseudomonas* sp.  
776 consortium during naphthalene biodegradation. **A.** Gompertz's growth kinetic  
777 model fit of the biodegradation of naphthalene by *Pseudomonas putida* strain  
778 KD10 and by the *Pseudomonas* sp. consortium. **B.** Effect of 0.5 gm. % sucrose  
779 supplementation on growth pattern of *Pseudomonas putida* strain KD10 and  
780 *Pseudomonas* sp. consortium.

781 **Figure 2.** Cell immobilization in calcium alginate beads (CABs) with different  
782 cell morphology of the *Pseudomonas putida* strain KD10.  
783

784 **Figure 3.** Sequence and structure analysis of the naphthalene 1, 2-dioxygenase  
785 (*nahAc*) encoded by *Pseudomonas putida*. **A.** The amino acid sequence of wild  
786 type and three mutant variants of the naphthalene 1, 2-dioxygenase (*nahAc*).  
787 Mutated residues are highlighted in blue and the common mutation prone amino  
788 acid stretch is highlighted with red box. **B.** Structural mismatches among mutant  
789 variants and wild type naphthalene 1, 2-dioxygenase. Each mutated residues and  
790 its subsequent neighbour residues of all the mutant variant of naphthalene 1, 2-  
791 dioxygenase is overlaid with cartoon representation. The highlighted red circle  
792 indicates local mismatch among the mutant variant of naphthalene 1, 2-  
793 dioxygenase **C.** Different ligand binding posture of the naphthalene 1, 2-  
794 dioxygenase encoded by *Pseudomonas putida* strain KD10. Naphthalene (red),  
795 phenanthrene (cyan) and anthracene (green) binding postures with major  
796 interacting amino acid residues (left). Two-dimensional presentation of the  
797 interacting residues of *nahAc*<sub>1250, V256</sub> (right). **D.** Docking pose of naphthalene 1,  
798 2-dioxygenase (Chain A) encoded by *Pseudomonas putida* strain KD10. The  
799 four major naphthalene interacting residues and their molecular distance are  
800 labelled in black.

801

802



803 **Figure 4.** Distance matrix and cladogram of the naphthalene 1, 2-dioxygenase.  
804 The evolutionary distance of the naphthalene 1, 2-dioxygenase I<sub>250</sub>, V<sub>255</sub> variant  
805 encoded by *Pseudomonas putida* strain KD10 other variants by different  
806 microbial species is scaled by colour index (upper-left side).

807  
808

809 **Figure 5.** Naphthalene degradation kinetics of *Pseudomonas putida* strain KD10  
810 and *Pseudomonas* sp. consortium free and cell immobilized in calcium alginate  
811 beads.

812

813 **Figure 6.** Proposed pathway of naphthalene biodegradation by *Pseudomonas*  
814 *putida* strain KD10. Naphthalene (I), salicylic acid (II), salicylaldehyde (III),  
815 catechol (IV), pyruvate (V), glucose (VI), d-gluconic acid (VII). The grey arrow  
816 indicates alternative pathway via d-gluconic acid.

817  
818

819 *Table captions*

820 **Table 1.** Summary of rigid-flexible molecular docking for the analysed mutant  
821 naphthalene 1, 2-dioxygenase encoded by different *Pseudomonas putida*  
822 strains.

823

824 **Table 2.** Apparent enzyme kinetic parameters of naphthalene 1, 2-dioxygenase  
825 I<sub>250</sub>, V<sub>256</sub> encoded by *Pseudomonas putida* strain KD10.

826

827 **Table 3.** Parameters of first-order biodegradation kinetics of naphthalene by  
828 different free and immobilized *Pseudomonas putida* strains.

829

830 **Table 4.** Major metabolite detected by GCMS analysis during naphthalene  
831 biodegradation by *Pseudomonas putida* KD10.

832

833

834

835 *Supplementary section*

836

837 **Table S1.** Nucleotide sequences used as primer in polymerase chain reactions

838

839 **Table S2.** Parameters of substrate inhibition kinetic model of naphthalene  
840 biodegradation by different *Pseudomonas putida* strains immobilized in calcium  
841 alginate beads.

842 **Table S3.** Enumeration of viable cell in calcium alginate beads.

843 **Table S4.** Gompertz's growth curve model fit of *Pseudomonas putida* strain  
844 KD10 and *Pseudomonas* sp. consortium.

845

846 **Table S5.** Major amino acid residues of mutant variant of naphthalene 1, 2-  
847 dioxygenase <sub>I250, V256</sub> involve in hydrophobic interaction with different ligands.

848

849 **Figure S1.** Colony morphology and catechol confirmatory test. **A.** Colony  
850 morphology of *Pseudomonas putida* strain KD10 after 24 h of incubation. **B.**  
851 Colony morphology of *Pseudomonas putida* strain KD10 after one week of  
852 incubation.

853 **Figure S2.** Molecular phylogenetic analysis of *Pseudomonas putida* strain  
854 KD10.

855 **Figure S3.** Effect of cell adaptation on naphthalene biodegradation.

856 **Figure S4.** Mass spectra of the major metabolites detected during  
857 biodegradation of naphthalene in CSM as sole source of carbon and energy by  
858 *Pseudomonas putida* KD10.

859

860 **Figure S5.** Agarose gel electrophoresis of PCR products of catechol 2, 3-  
861 dioxygenase (*nahH*) gene and solvent efflux pump (*srpABC*) system.

862 **A.** Catechol 2, 3-dioxygenase (*nahH*). Lane 1 and 2 *nahH* pcr product of  
863 *Pseudomonas putida* strain KD9 and *Pseudomonas putida* strain KD10. **B.**  
864 Solvent efflux pump (*srpABC*) system. Lane 1: *Pseudomonas aeruginosa*  
865 ATCC 9027, Lane 2: *Pseudomonas putida* strain KD10. Lane M: 100bp DNA  
866 ladder (HiMedia, India), Lane 3: Negative control.

867

868 **Figure S6.** Nucleotide sequence chromatogram of the mutant naphthalene 1, 2-  
869 dioxygenase (*nahAc*), (chain-A) encoded by *Pseudomonas putida* strain KD10.

870

871

872

873

874  
875  
876  
877

**Table 1.** Summary of rigid-flexible molecular docking of naphthalene and different mutant version of naphthalene 1, 2-dioxygenase encoded by different *Pseudomonas putida* strains

| $\Delta G^*$       |                     |                           | LB <sup>4</sup> | IC <sup>5</sup> | IME <sup>6</sup> | VDW <sup>7</sup> | RMSD <sup>c</sup> | RMSD <sup>r</sup> | References         |
|--------------------|---------------------|---------------------------|-----------------|-----------------|------------------|------------------|-------------------|-------------------|--------------------|
| BE <sup>1</sup>    | London <sup>2</sup> | GBVI/<br>WSA <sup>3</sup> |                 |                 |                  |                  |                   |                   |                    |
| -5.92 <sup>a</sup> | -7.18               | -4.61                     | -0.59           | 46.14           | -5.92            | -5.91            | 0.00              | 77.29             | Dutta et al., 2017 |
| -5.41 <sup>b</sup> | -7.13               | -4.02                     | -0.54           | 109.07          | -5.41            | -5.4             | 0.00              | 96.32             | Dutta et al., 2019 |
| -5.83 <sup>c</sup> | -7.10               | -1.68                     | -0.58           | 53.13           | -5.83            | -5.84            | 0.00              | 96.08             | This study         |

\*PubChem ligand CID 931 = Naphthalene, BE<sup>1</sup> = Binding free energy, <sup>2</sup>London free energy, <sup>3</sup>Generalized born volume integral/weighted surface areas, LB<sup>4</sup> = ligand binding, IC<sup>5</sup> = inhibition constant, IME<sup>6</sup> = Intermolecular energy, VDW<sup>7</sup> = Vdw hb desolv energy, RMSD<sup>c</sup> = Cluster RMSD, RMSD<sup>r</sup> = Reference RMSD. Energy unit = kcal mol<sup>-1</sup>. Inhibition constant unit =  $\mu$ M.at 298.15 K. Naphthalene 1, 2-dioxygenase encoded by (a) *Pseudomonas putida* strain KD6, (b) *Pseudomonas putida* strain KD9 and (c) *Pseudomonas putida* strain KD10.

878  
879  
880  
881  
882  
883  
884  
885  
886  
887  
888  
889  
890  
891  
892  
893  
894  
895  
896  
897  
898

899  
900  
901  
902  
903  
904  
905  
906  
907  
908  
909  
910  
911  
912  
913

**Table 2.** Apparent enzyme kinetic parameters of naphthalene 1, 2-dioxygenase<sub>I250, V256</sub> encoded by *Pseudomonas putida* strain KD10

| Substrate   | Kinetic parameters*                           |                                                  |                                         |                                                                                        |                  |
|-------------|-----------------------------------------------|--------------------------------------------------|-----------------------------------------|----------------------------------------------------------------------------------------|------------------|
|             | K <sub>m</sub><br>( $\mu\text{mol mL}^{-1}$ ) | V <sub>max</sub><br>( $\mu\text{mol min}^{-1}$ ) | K <sub>cat</sub><br>( $\text{s}^{-1}$ ) | K <sub>cat</sub> /K <sub>m</sub><br>( $\text{mL}^{-1} \text{mol}^{-1} \text{s}^{-1}$ ) | R <sup>2**</sup> |
| Naphthalene | 0.867                                         | 2.474                                            | 123.72                                  | $0.142 \times 10^3$                                                                    | 0.938            |

\*The kinetic constants were determined at 30°C and pH 7.5 using 0.5-10 $\mu\text{M mL}^{-1}$  substrate concentration (each) by Lineweaver–Burk plot.

\*\* Non-linear regression between initial substrate concentration 1/[S] and degradation rate constant 1/V yielded regression equation and regression coefficient (R<sup>2</sup>)

914  
915  
916  
917  
918  
919  
920  
921  
922  
923  
924  
925  
926  
927

928  
929  
930  
931  
932  
933  
934  
935  
936  
937  
938  
939  
940

**Table 3.** Parameters of first-order biodegradation kinetics of naphthalene by different free and immobilized *Pseudomonas putida* strains

| CSM | Cells immobilized in CABs    |                                    |       | free cells                   |                                    |       | References         |
|-----|------------------------------|------------------------------------|-------|------------------------------|------------------------------------|-------|--------------------|
|     | $k$<br>(Days <sup>-1</sup> ) | $t_{1/2}$<br>(Days <sup>-1</sup> ) | $R^2$ | $k$<br>(Days <sup>-1</sup> ) | $t_{1/2}$<br>(Days <sup>-1</sup> ) | $R^2$ |                    |
| A   | 0.228±0.005                  | 3.0±0.077                          | 0.99  | 0.167±0.012                  | 4.1±0.307                          | 0.98  | Dutta et al., 2017 |
| B   | 0.312±0.014                  | 2.2±0.102                          | 0.93  | 0.252±0.019                  | 2.7±0.193                          | 0.99  | Dutta et al., 2018 |
| C   | 0.284±0.017                  | 2.4±0.143                          | 0.97  | 0.219±0.009                  | 3.1±0.137                          | 0.92  | This study         |
| D   | 0.341±0.294                  | 2.0±0.186                          | 0.99  | 0.309±0.020                  | 2.2±0.141                          | 0.98  | This study         |

#Initial naphthalene concentration = 500 mg L<sup>-1</sup>

A. *Pseudomonas putida* strain KD6, B. *Pseudomonas putida* strain KD9, C. *Pseudomonas putida* strain KD10. D. *Pseudomonas* sp. consortium.

Each figure of the table represents the mean of three replicates.

941  
942  
943  
944  
945  
946  
947  
948  
949  
950  
951

952  
953  
954  
955  
956  
957  
958  
959  
960  
961  
962  
963

**Table 4.** Major metabolites detected by GCMS analysis during naphthalene biodegradation by *Pseudomonas putida* KD10

| Metabolite | R <sub>t</sub><br>(min) | Major ion peaks (m/z)                                                | Suggested structure |
|------------|-------------------------|----------------------------------------------------------------------|---------------------|
| I          | 9.41                    | 64.19, 92.17, 120.21, 138.22, 169.14, 191.18, 211.10                 | Salicylic acid      |
| II         | 15.27                   | 65.17, 74.41, 104.73, 121.10, 122.57, 142.21, 174.80, 201.22, 249.31 | Salicylaldehyde     |
| III        | 18.71                   | 64.29, 81.35, 91.61, 110.47, 131.47, 149.71                          | Catechol            |
| IV         | 31.89                   | 61.21, 73.44, 76.24, 104.18, 117.41, 133.27, 177.23                  | D-gluconic acid     |
| V          | 10.47                   | 43.21, 61.27, 71.37                                                  | Pyruvic acid        |

R<sub>t</sub> = Retention time

964  
965  
966  
967  
968  
969  
970  
971  
972  
973  
974

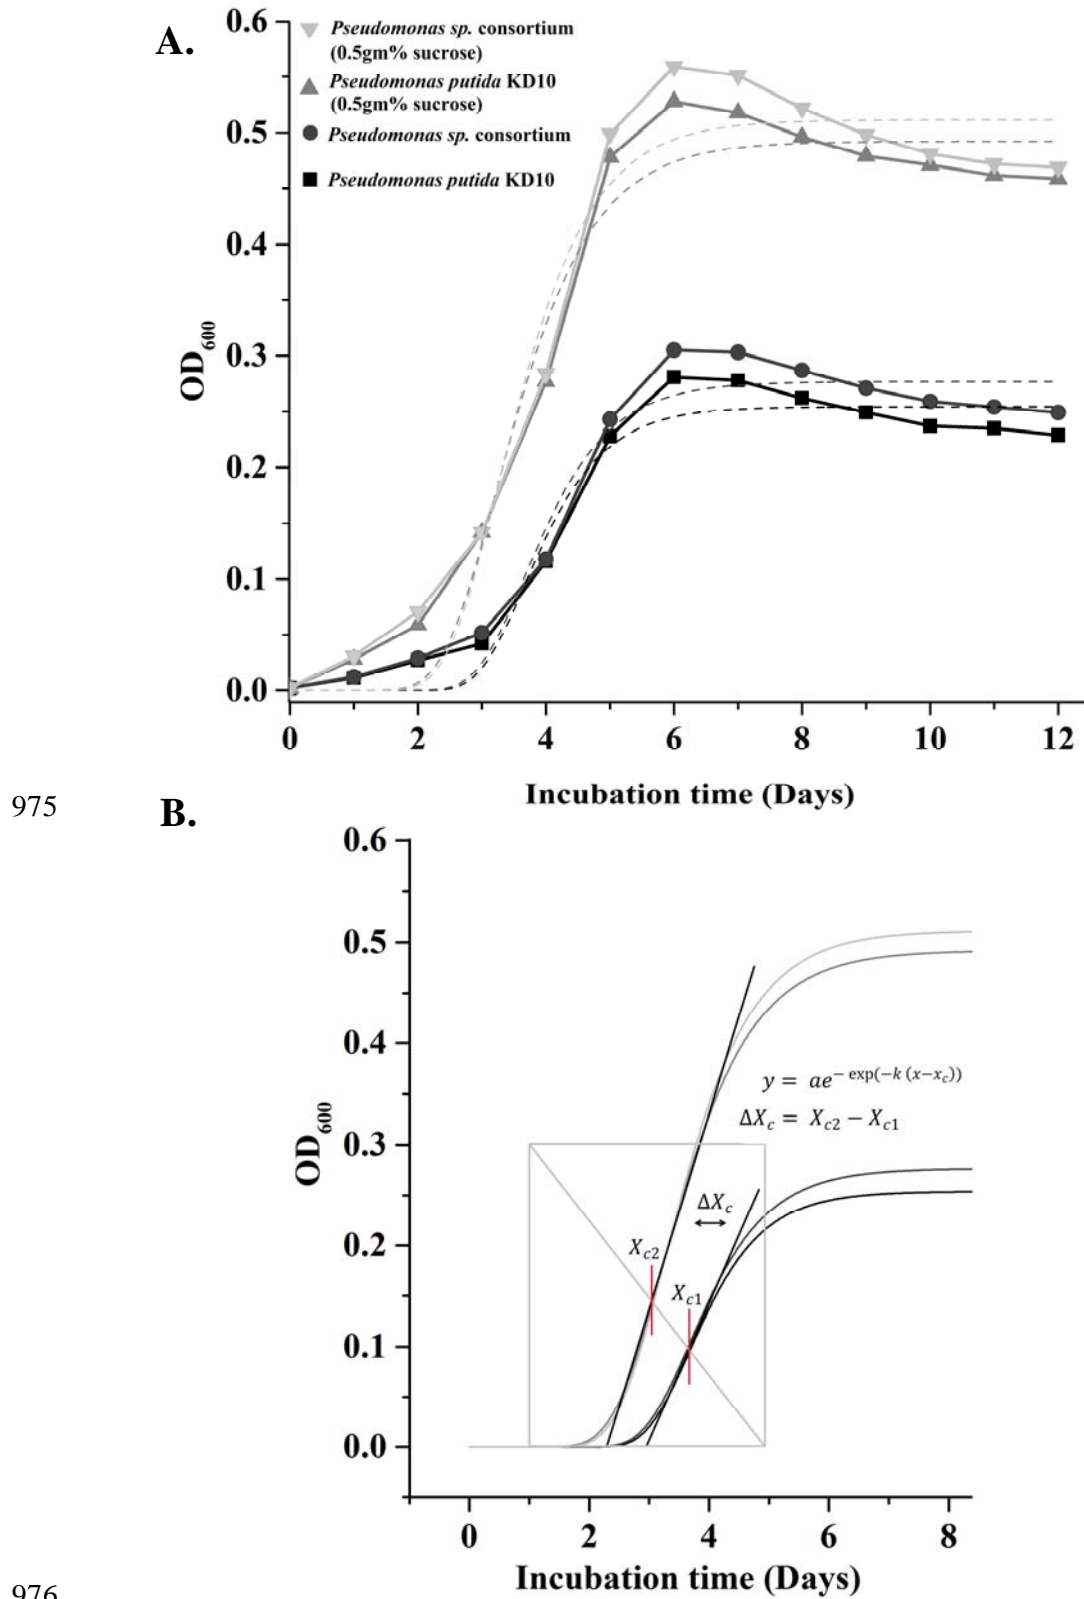

Figure 1.

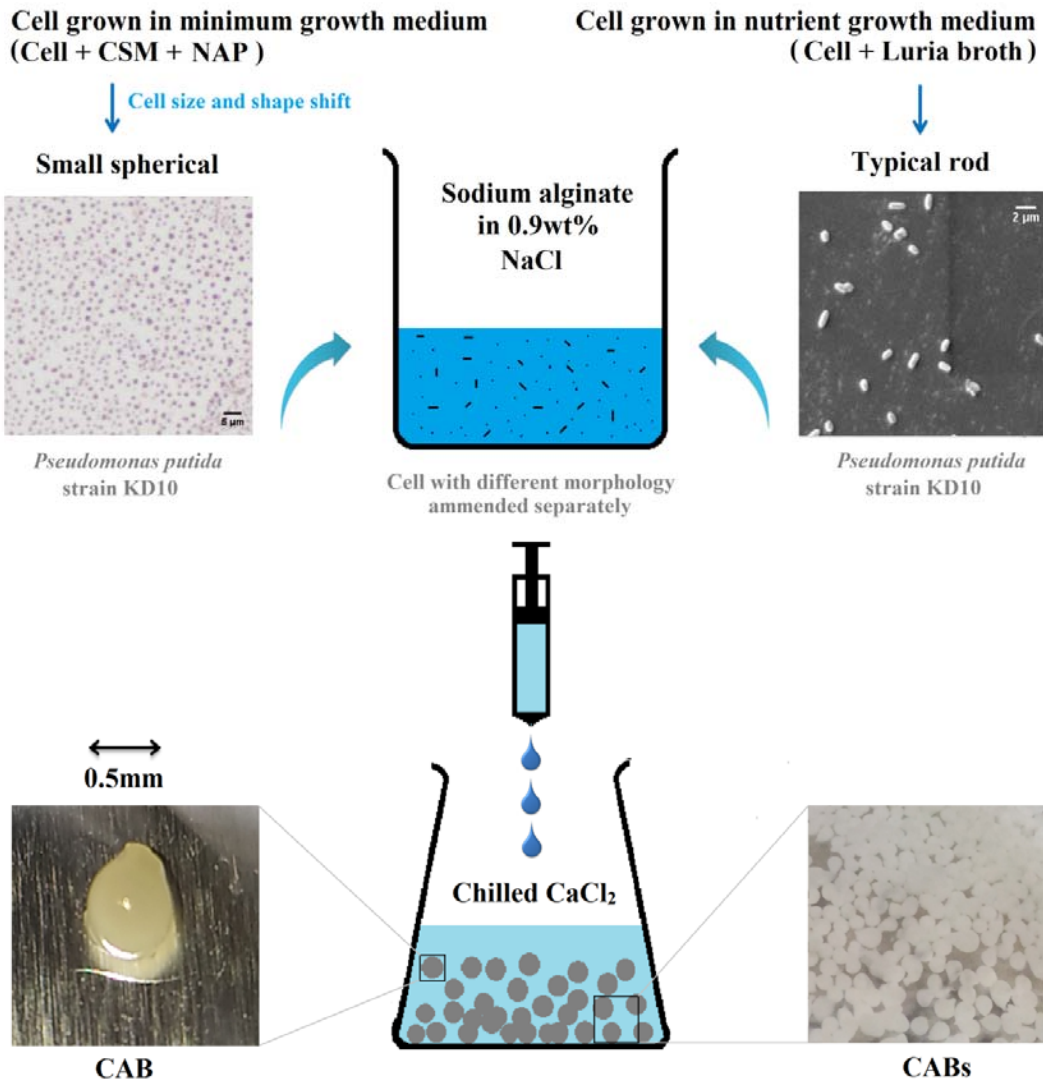

977

CAB

978

Figure 2.



**A.** >Chain A, Naphthalene 1, 2-Dioxygenase

```

10      20      30      40      50      60      70
1NDO  MNYNNKILVSEGLSQKHLIHGDEELFOHELKTIFARNWLFLTHDSLIPAPGDYVTAKMGIDEVIVSRON
      80      90     100     110     120     130     140
1NDO  DGSIRAFLNVCRHRGKTLVSVVEAGNAKGFVCSYHGWFGSNGELQSVPFEKDLYGESLNKKCLGLKEVAR
      150     160     170     180     190     200     210
1NDO  VESFHGFFIYGCFDQEAPPLMDYLGDAAWYLEPMFKHSSGGLELVGPPGKVVIKANWKAPAENFVGDAYHVG
      220     230     240     250     260     270     280
KD6   VESFHGFFIYGCFDQEAPPLMDYLGDAAWYLEPMFKHSSGGLELVGPPGKVVIKANWKAPAENFVGDAYHVG
      220     230     240     250     260     270     280
1NDO  WTHASSLRSGESIFSSLAGNAALPPEGAGLQMTSKYSGMGVLWDGYSGVHSADLVPELMAFGGAKQERL
      290     300     310     320     330     340     350
KD10  WTHASSLRSGESIFSSLAGNAALPPEGAGLQMTSKYSGMGVLWDVYSGVHSADLVPELMAFGGAKQERL
      290     300     310     320     330     340     350
KD9   WTHASSLRSGESIFSSLAGNAALPPEGAGLQMTSKYSGMGVLWDVYSGVHSADLVPELMAFGGAKQERL
      290     300     310     320     330     340     350
KD6   WTHASSLRSGESIFSSLAGNAALPPEGAGLQMTSKYSGMGVLWDVYSGVHSADLVPELMAFGGAKQERL
      290     300     310     320     330     340     350
1NDO  NKEIGDVRARIYRSHLNCTVFPNNSMLTCSGVFKVWNPIDANTTEVWTYAIVEKDMPEDLKRRLADSVQR
      360     370     380     390     400     410     420
KD6   NKEIGDVRARIYRSHLNCTVFPNNSMLTCSGVFKVWNPIDANTTEVWTYAIVEKDMPEDLKRRLADSVQR
      360     370     380     390     400     410     420
KD9   NKEIGDVRARIYRSHLNCTVFPNNSMLTCSGVFKVWNPIDANTTEVWTYAIVEKDMPEDLKRRLADSVQR
      360     370     380     390     400     410     420
1NDO  TFGPAGFWESDDNDNMETASQNGKYQSRDSDLNLSLGFGEDVYGDAVYPGVVGKSAIGETSYRGFYRAY
      430     440     449
1NDO  QAHVSSNWAEFEHASSTWHTELTKTDR
    
```

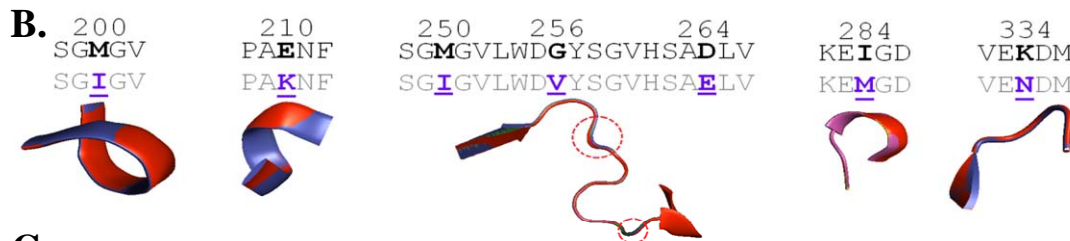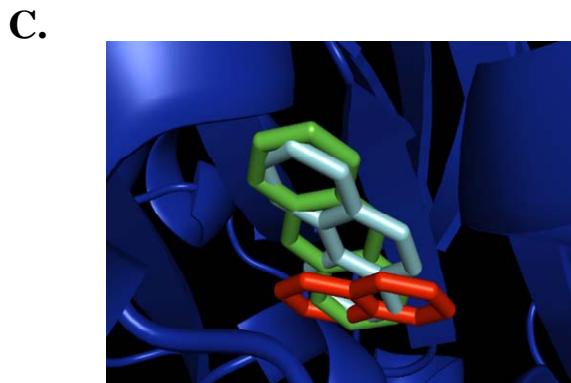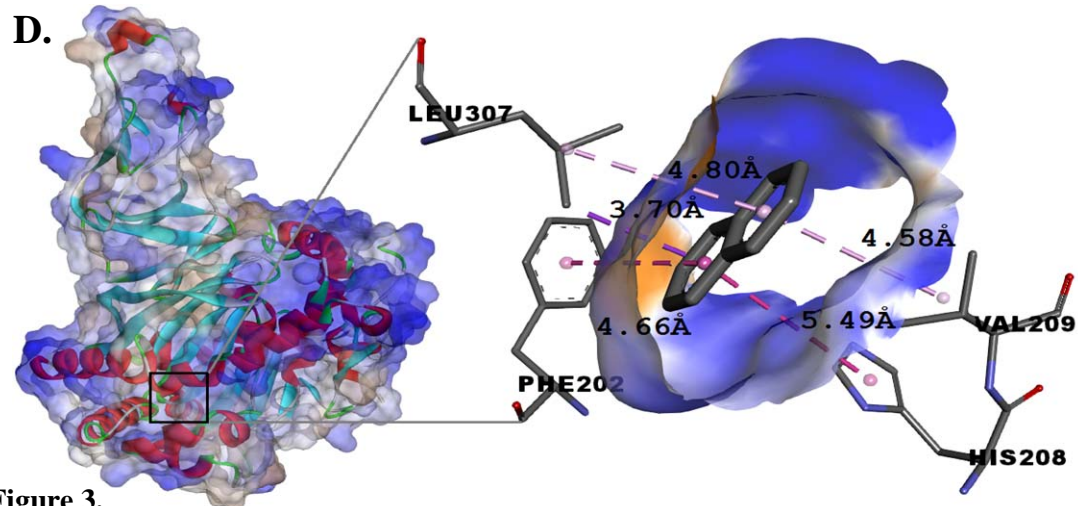

979 Figure 3.

980

981

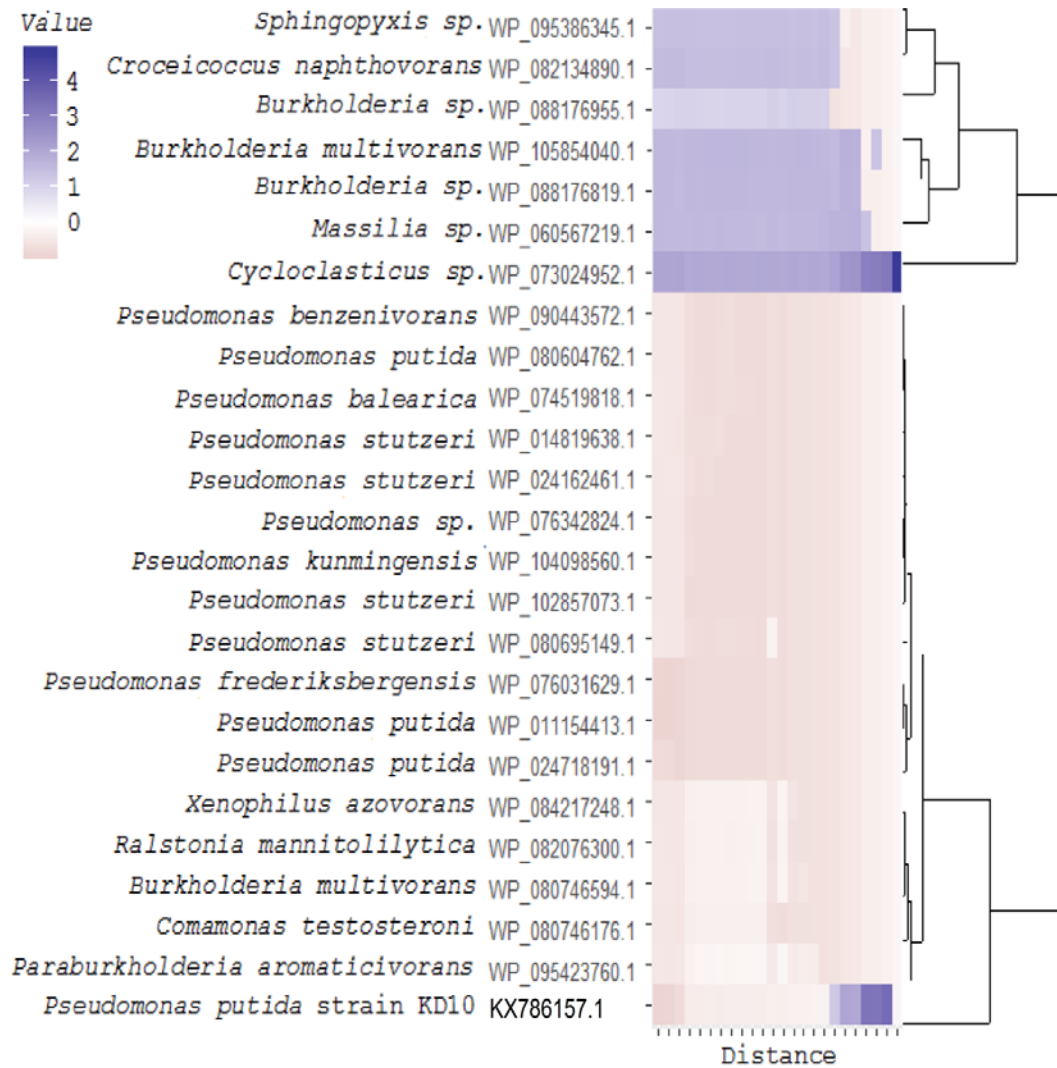

982

983 **Figure 4.**

984

985

986

987

988

989

990

991

992

993

994

995

996  
997  
998  
999

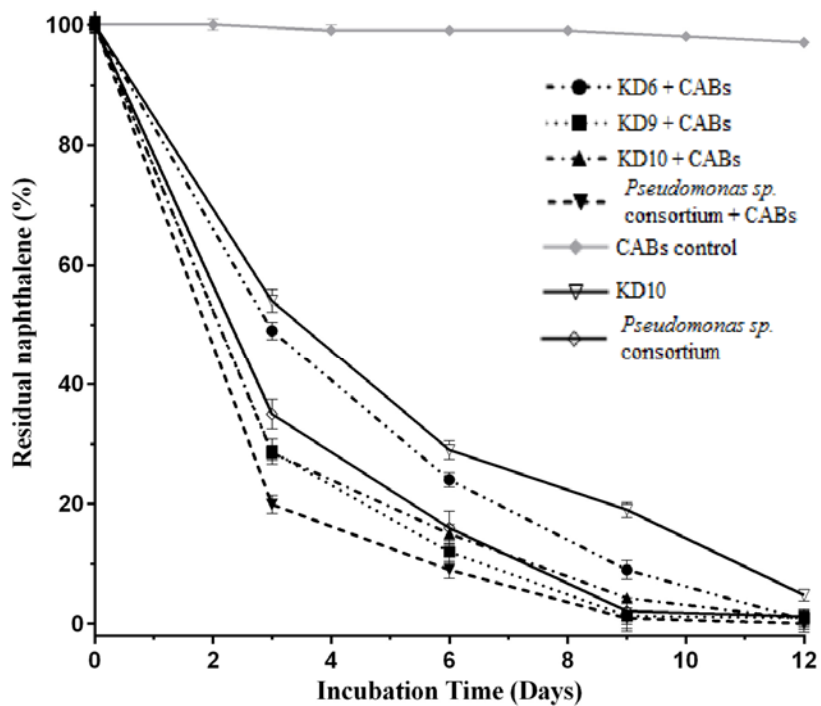

1000  
1001  
1002  
1003  
1004  
1005  
1006  
1007  
1008  
1009  
1010  
1011  
1012  
1013  
1014  
1015  
1016

Figure 5.

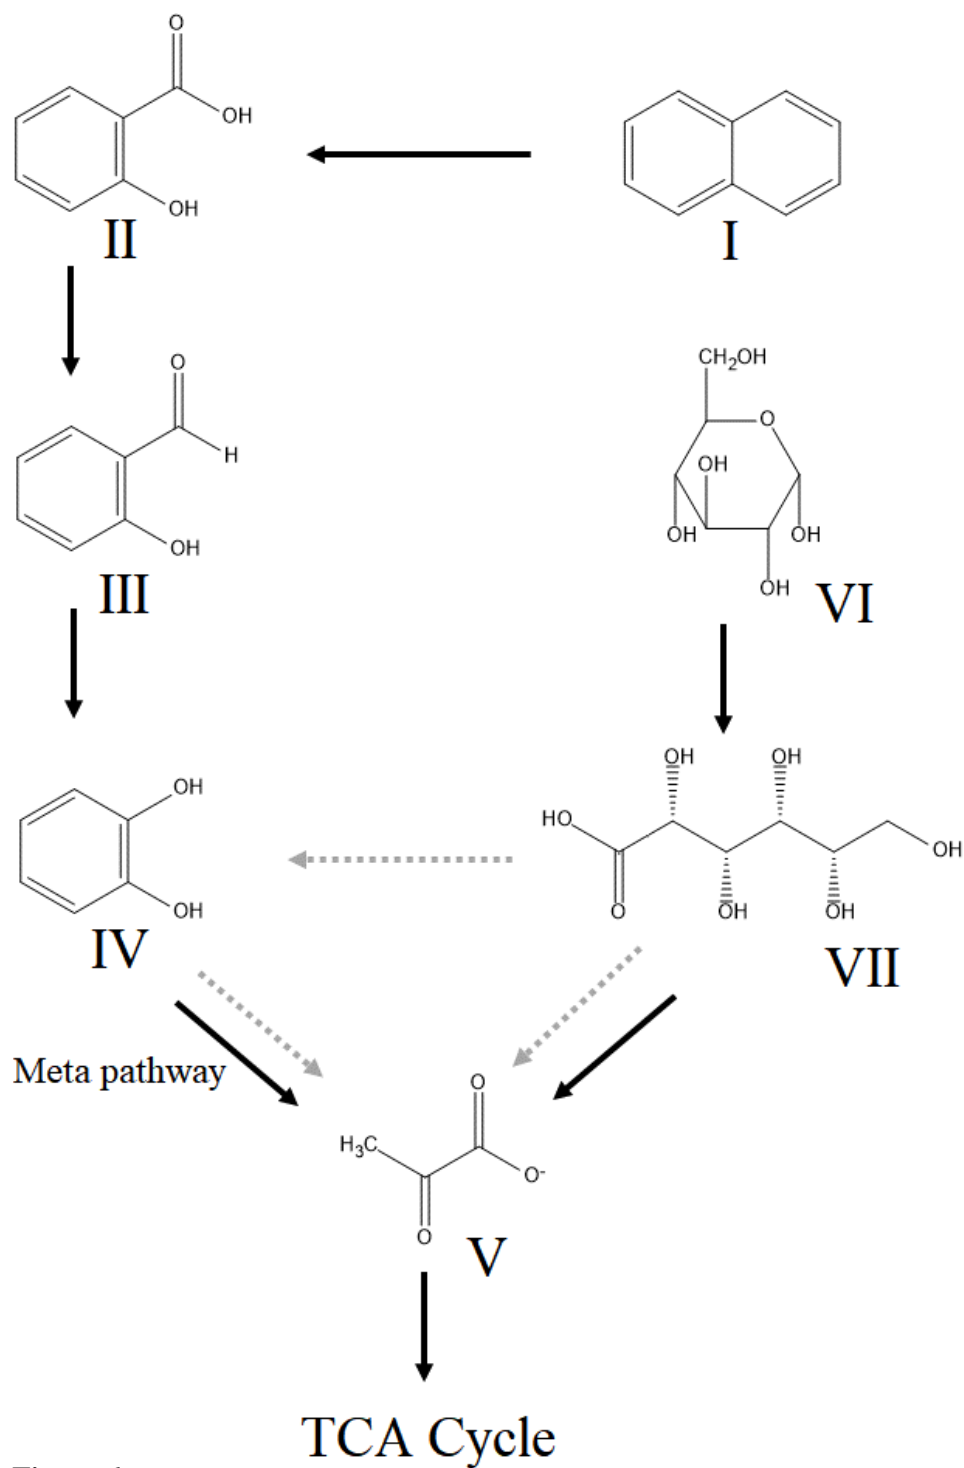

1017

Figure 6.
